# Supplementary material
Source: Springer Nature journal article supplement (https://www.springermedizin.de/resource/supplementary/13014_2011_565_MOESM5_ESM.pdf/9634132)

### Migration

— 0 Gy — 18 Gy

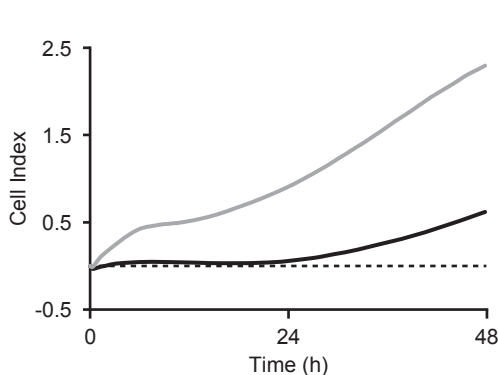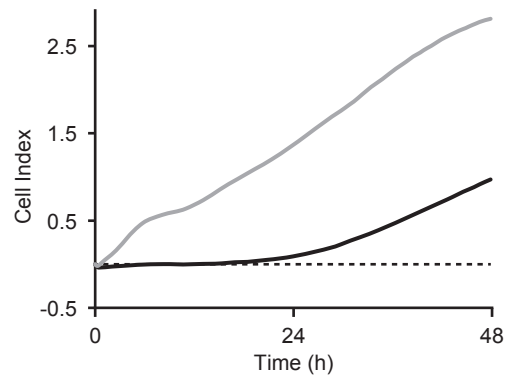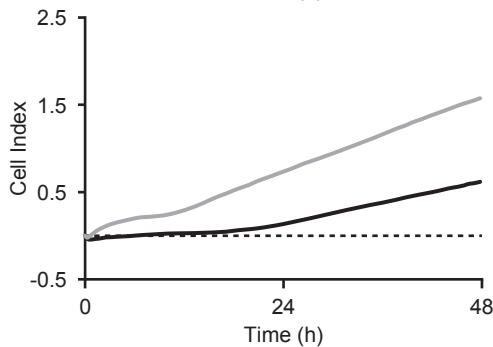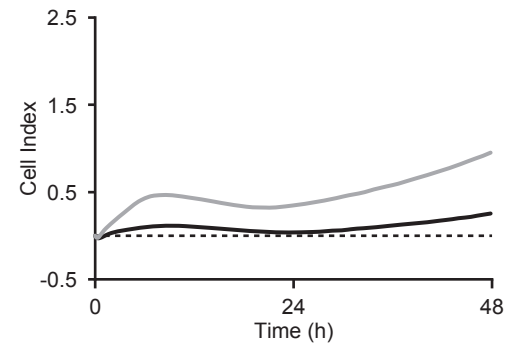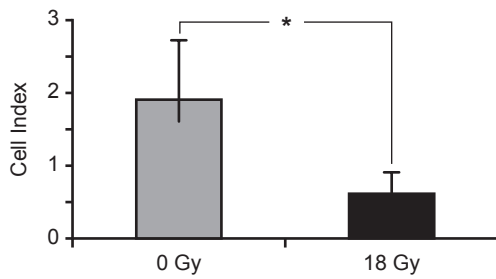

Supplement: MOESM5 [file 9634132]
